# Supplementary material for: The YMgB5O10 crystal preparation and attractive multi-wavelength emission characteristics of doping Nd3+ ions
Source: Royal Society of Chemistry journal article supplement (doi:10.1039/d0tc05372d), 2020-12-23
Supplement: d0tc05372d1.pdf [file d0tc05372d1.pdf]

## Supplementary Information

### **YMgB<sub>5</sub>O<sub>10</sub> crystal preparation and attractive multi-wavelength emission characteristics of doping Nd<sup>3+</sup> ions**

Shijia Sun,<sup>a</sup> Qi Wei,<sup>a</sup> Bingxuan Li,<sup>b</sup> Xingjun Shi,<sup>a</sup> Feifei Yuan,<sup>b</sup> Fei Lou,<sup>c</sup> Lizhen Zhang,<sup>b</sup> Zhoubin Lin<sup>b</sup>, Degao Zhong,<sup>a</sup> Yisheng Huang<sup>\*b</sup> and Bing Teng<sup>\*a</sup>

<sup>a</sup> College of Physics, University-Industry Joint Center for Ocean Observation and Broadband Communication, National Demonstration Center for Experimental Applied Physics Education, Qingdao University, Qingdao 266071, China. E-mail: [5108tb@163.com](mailto:5108tb@163.com)

<sup>b</sup> Key Laboratory of Optoelectronic Materials Chemistry and Physics, Fujian Institute of Research on the Structure of Matter, Chinese Academy of Sciences, Fuzhou 350002, China. E-mail: [hysh@fjirsm.ac.cn](mailto:hysh@fjirsm.ac.cn)

<sup>c</sup> School of Mathematics and Physics, Qingdao University of Science and Technology, Qingdao 266061, China

**Fig. S1.** Schematic diagram of crystal growth apparatus.

**Fig. S2.** (a) The coordination environments of B, Y and Mg atoms. (b) View of the B<sub>5</sub>O<sub>12</sub> cluster. (c) View of the topological network of B-O layer along [101] direction.

**Table S1.** Atomic coordinates and equivalent isotropic displacement parameters of YMB crystal.

**Table S2.** Selected bond distances (Å) of YMB crystal.

**Table S3.** Indexation results of powder XRD pattern.

**Calculations of Judd–Ofelt theory.**

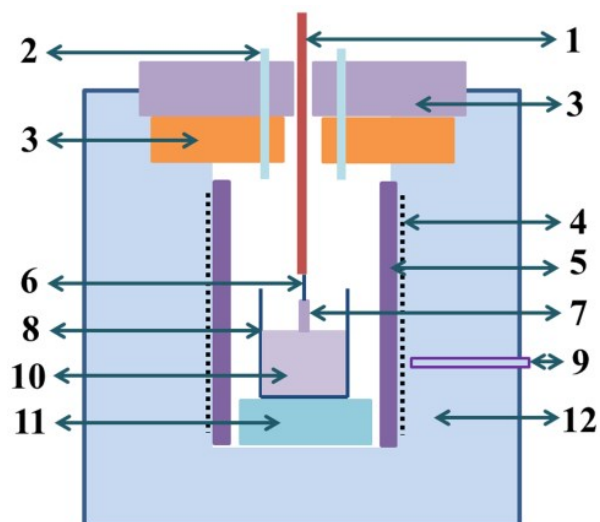

**Fig. S1.** Schematic diagram of crystal growth apparatus. (1) seed-holder, (2) watch window, (3) furnace cover (thermal insulation materials), (4) nickel-chrome heating wires, (5) Al<sub>2</sub>O<sub>3</sub> tube, (6) platinum wires, (7) seed, (8) platinum crucible, (9) thermocouple, (10) solution, (11) thermal insulation materials (the height is based on the thermal field ), (12) thermal insulation materials.

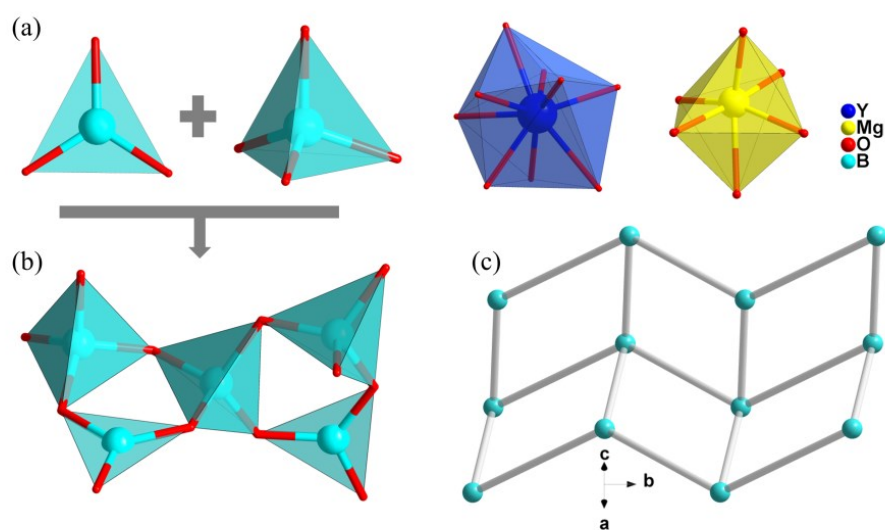

**Fig. S2.** (a) The coordination environments of B, Y and Mg atoms. (b) View of the B<sub>5</sub>O<sub>12</sub> cluster. (c) View of the topological network of B-O layer along [101] direction.

**Table S1.** Atomic coordinates and equivalent isotropic displacement parameters of YMB crystal.

| Atom  | <i>x/a</i> | <i>y/b</i> | <i>z/c</i> | <i>U</i> (eq)[Å <sup>2</sup> ]* |
|-------|------------|------------|------------|---------------------------------|
| Y(1)  | 1855(1)    | 1865(1)    | 2390(1)    | 2(1)                            |
| Mg(1) | 1005(1)    | 916(2)     | 6278(1)    | 4(1)                            |
| O(10) | 4638(3)    | 2086(3)    | 2691(3)    | 2(1)                            |
| O(9)  | -843(3)    | -275(3)    | 1484(3)    | 3(1)                            |
| O(8)  | 1812(3)    | 3495(3)    | 6350(3)    | 4(1)                            |
| O(7)  | 3185(3)    | 1276(3)    | -93(3)     | 4(1)                            |
| O(6)  | 458(3)     | 2713(3)    | 208(3)     | 4(1)                            |
| O(5)  | 50(3)      | 1498(3)    | 4267(3)    | 4(1)                            |
| O(4)  | -95(3)     | 4101(3)    | 3033(3)    | 4(1)                            |
| O(3)  | 3142(3)    | -332(3)    | 6267(3)    | 4(1)                            |
| O(2)  | 2568(3)    | -510(3)    | 3736(3)    | 4(1)                            |
| O(1)  | 1764(3)    | -1073(3)   | 825(3)     | 4(1)                            |
| B(5)  | -178(5)    | 1741(5)    | -1048(5)   | 3(1)                            |
| B(4)  | 843(5)     | 4243(5)    | 7425(5)    | 4(1)                            |
| B(3)  | -657(5)    | 3105(5)    | 4111(5)    | 4(1)                            |
| B(2)  | -2230(5)   | 315(5)     | 548(5)     | 4(1)                            |
| B(1)  | 1599(5)    | 3997(5)    | 55(5)      | 3(1)                            |

\* *U*(eq) is defined as one-third of the trace of the orthogonalized *U*<sub>ij</sub> tensor.

**Table S2.** Selected bond distances (Å) of YMB crystal.

|               |          |             |          |
|---------------|----------|-------------|----------|
| Y(1)-O(2)     | 2.254(2) | B(5)-O(9)#8 | 1.482(5) |
| Y(1)-O(2)#1   | 2.314(2) | B(1)-O(6)   | 1.387(5) |
| Y(1)-O(10)    | 2.375(3) | B(5)-O(6)   | 1.461(5) |
| Y(1)-O(6)     | 2.385(2) | B(3)-O(5)   | 1.359(5) |
| Y(1)-O(5)     | 2.422(3) | B(3)-O(4)   | 1.369(5) |
| Y(1)-O(4)     | 2.470(2) | B(4)-O(4)#9 | 1.456(5) |
| Y(1)-O(1)#1   | 2.521(3) | B(1)-O(3)#5 | 1.368(5) |
| Y(1)-O(1)     | 2.659(3) | B(4)-O(3)#4 | 1.488(5) |
| Y(1)-O(7)     | 2.686(3) | B(1)-O(2)#5 | 1.349(5) |
| Mg(1)-O(3)    | 2.051(3) | B(5)-O(1)#8 | 1.469(5) |
| Mg(1)-O(5)    | 2.051(3) | B(2)-O(1)#8 | 1.483(5) |
| Mg(1)-O(8)    | 2.066(3) | B(2)-O(9)   | 1.494(5) |
| Mg(1)-O(5)#2  | 2.083(3) | B(2)-O(8)#7 | 1.455(5) |
| Mg(1)-O(9)#2  | 2.162(3) | B(4)-O(8)   | 1.456(5) |
| Mg(1)-O(10)#3 | 2.361(3) | B(3)-O(7)#6 | 1.356(5) |
| B(4)-O(10)#6  | 1.468(5) | B(2)-O(7)#8 | 1.498(5) |
| B(5)-O(10)#7  | 1.477(5) |             |          |

Symmetry codes: (#1) -x+3/2,y+1/2,-z+3/2; (#2) -x+1/2,y+1/2,-z+3/2; (#3) x-1/2,-y+1/2,z+1/2; (#4) -x+1/2,y-1/2,-z+3/2; (#5) -x+1,-y,-z+1; (#6) x+1/2,-y+1/2,z-1/2; (#7) -x+1,-y,-z+2; (#8) x-1,y,z; (#9) -x+2,-y,-z+2.

**Table S3.** Indexation results of powder XRD pattern.

| d (Å)  | 2 $\theta$ (deg.) | h  | k | l | d (Å)  | 2 $\theta$ (deg.) | h  | k | l |
|--------|-------------------|----|---|---|--------|-------------------|----|---|---|
| 6.5086 | 13.5935           | -1 | 0 | 1 | 1.9295 | 47.0558           | 2  | 1 | 4 |
| 6.1102 | 14.4843           | 1  | 0 | 1 | 1.9256 | 47.1574           | -1 | 3 | 3 |
| 5.8754 | 15.0665           | 0  | 1 | 1 | 1.9233 | 47.2178           | -4 | 1 | 2 |
| 5.6584 | 15.6478           | 1  | 1 | 0 | 1.9120 | 47.515            | 1  | 2 | 4 |
| 4.9321 | 17.9701           | -1 | 1 | 1 | 1.8957 | 47.9475           | 4  | 0 | 2 |
| 4.7518 | 18.6577           | 1  | 1 | 1 | 1.8925 | 48.0353           | 1  | 3 | 3 |
| 4.6695 | 18.9896           | 0  | 0 | 2 | 1.8896 | 48.1115           | 0  | 4 | 0 |
| 4.2671 | 20.7993           | 2  | 0 | 0 | 1.8861 | 48.2071           | 3  | 3 | 0 |
| 3.9726 | 22.3606           | 0  | 1 | 2 | 1.8815 | 48.3322           | -3 | 2 | 3 |
| 3.7793 | 23.52             | 0  | 2 | 0 | 1.864  | 48.8152           | -3 | 3 | 1 |
| 3.7159 | 23.9274           | 2  | 1 | 0 | 1.8579 | 48.9862           | 4  | 2 | 0 |
| 3.6781 | 24.1767           | -1 | 1 | 2 | 1.8521 | 49.1503           | 0  | 4 | 1 |
| 3.5295 | 25.2111           | 1  | 1 | 2 | 1.8492 | 49.232            | -1 | 0 | 5 |
| 3.5199 | 25.2808           | -2 | 1 | 1 | 1.8449 | 49.3535           | 1  | 4 | 0 |
| 3.5033 | 25.4027           | 0  | 2 | 1 | 1.8417 | 49.445            | -4 | 2 | 1 |
| 3.4556 | 25.7592           | 1  | 2 | 0 | 1.839  | 49.5226           | -2 | 2 | 4 |
| 3.389  | 26.2745           | 2  | 1 | 1 | 1.8388 | 49.5306           | 4  | 1 | 2 |
| 3.2683 | 27.2636           | -1 | 2 | 1 | 1.8339 | 49.6709           | 3  | 3 | 1 |
| 3.2543 | 27.3831           | -2 | 0 | 2 | 1.8147 | 50.2327           | -1 | 4 | 1 |
| 3.2142 | 27.7316           | 1  | 2 | 1 | 1.8132 | 50.2759           | 0  | 1 | 5 |
| 3.0551 | 29.2067           | 2  | 0 | 2 | 1.8093 | 50.3915           | -3 | 1 | 4 |
| 2.989  | 29.8673           | -2 | 1 | 2 | 1.8074 | 50.4489           | -2 | 3 | 3 |
| 2.986  | 29.8979           | -1 | 0 | 3 | 1.8053 | 50.5133           | 1  | 4 | 1 |
| 2.9377 | 30.4017           | 0  | 2 | 2 | 1.8033 | 50.5731           | 4  | 2 | 1 |
| 2.8784 | 31.043            | 0  | 1 | 3 | 1.8009 | 50.6437           | 1  | 0 | 5 |
| 2.8666 | 31.1739           | 1  | 0 | 3 | 1.7962 | 50.7853           | -1 | 1 | 5 |
| 2.8325 | 31.5597           | 2  | 1 | 2 | 1.7929 | 50.8859           | 3  | 2 | 3 |
| 2.8292 | 31.5974           | 2  | 2 | 0 | 1.7749 | 51.4402           | -3 | 3 | 2 |
| 2.8124 | 31.7908           | -1 | 2 | 2 | 1.7647 | 51.7586           | 2  | 2 | 4 |
| 2.7772 | 32.2052           | -1 | 1 | 3 | 1.7642 | 51.7766           | -4 | 1 | 3 |
| 2.7706 | 32.2831           | -3 | 0 | 1 | 1.7599 | 51.9096           | -4 | 2 | 2 |
| 2.7443 | 32.6019           | 1  | 2 | 2 | 1.7536 | 52.1107           | 2  | 3 | 3 |
| 2.7398 | 32.6569           | -2 | 2 | 1 | 1.7519 | 52.1664           | 1  | 1 | 5 |
| 2.6804 | 33.4018           | 1  | 1 | 3 | 1.7516 | 52.1743           | 0  | 4 | 2 |
| 2.6767 | 33.4493           | 2  | 2 | 1 | 1.7278 | 52.9499           | 2  | 4 | 0 |
| 2.6745 | 33.4773           | 3  | 0 | 1 | 1.7239 | 53.0771           | -1 | 4 | 2 |
| 2.6624 | 33.6335           | 3  | 1 | 0 | 1.7239 | 53.0797           | 3  | 3 | 2 |
| 2.6014 | 34.447            | -3 | 1 | 1 | 1.7125 | 53.46             | 0  | 3 | 4 |
| 2.5213 | 35.5769           | 3  | 1 | 1 | 1.7079 | 53.6158           | 1  | 4 | 2 |
| 2.466  | 36.4021           | -2 | 2 | 2 | 1.707  | 53.6455           | -2 | 1 | 5 |
| 2.4538 | 36.5897           | -2 | 1 | 3 | 1.7068 | 53.6527           | -2 | 4 | 1 |
| 2.4325 | 36.9208           | 0  | 3 | 1 | 1.706  | 53.681            | 3  | 1 | 4 |
| 2.4164 | 37.1764           | 1  | 3 | 0 | 1.6981 | 53.9486           | -5 | 0 | 1 |
| 2.4028 | 37.3947           | 0  | 2 | 3 | 1.6945 | 54.0745           | 4  | 2 | 2 |
| 2.3759 | 37.8345           | 2  | 2 | 2 | 1.6943 | 54.0815           | -1 | 3 | 4 |
| 2.3742 | 37.8621           | -3 | 1 | 2 | 1.6912 | 54.1874           | 2  | 4 | 1 |
| 2.3496 | 38.2738           | -1 | 3 | 1 | 1.6744 | 54.7754           | 0  | 2 | 5 |

|        |         |    |   |   |        |         |    |   |   |
|--------|---------|----|---|---|--------|---------|----|---|---|
| 2.343  | 38.3869 | -1 | 2 | 3 | 1.6714 | 54.8843 | -3 | 2 | 4 |
| 2.3347 | 38.5273 | 0  | 0 | 4 | 1.6679 | 55.0073 | 4  | 1 | 3 |
| 2.3293 | 38.6213 | 1  | 3 | 1 | 1.6649 | 55.1159 | 5  | 1 | 0 |
| 2.324  | 38.7123 | 2  | 1 | 3 | 1.6642 | 55.1417 | 1  | 3 | 4 |
| 2.2839 | 39.4191 | 1  | 2 | 3 | 1.661  | 55.2554 | -1 | 2 | 5 |
| 2.2728 | 39.6202 | 3  | 2 | 0 | 1.6605 | 55.274  | 5  | 0 | 1 |
| 2.256  | 39.9271 | 3  | 1 | 2 | 1.6568 | 55.4072 | -5 | 1 | 1 |
| 2.2345 | 40.3291 | -3 | 2 | 1 | 1.644  | 55.8777 | -3 | 3 | 3 |
| 2.2307 | 40.3997 | 0  | 1 | 4 | 1.6356 | 56.1914 | -4 | 2 | 3 |
| 2.2173 | 40.6547 | 0  | 3 | 2 | 1.6341 | 56.2456 | -2 | 4 | 2 |
| 2.1909 | 41.1672 | -1 | 1 | 4 | 1.6331 | 56.2848 | 2  | 1 | 5 |
| 2.1831 | 41.3207 | 3  | 2 | 1 | 1.6282 | 56.4687 | 4  | 3 | 0 |
| 2.1696 | 41.591  | 2  | 3 | 0 | 1.6271 | 56.5092 | -4 | 0 | 4 |
| 2.1695 | 41.5921 | -3 | 0 | 3 | 1.6258 | 56.5601 | 1  | 2 | 5 |
| 2.162  | 41.7439 | -1 | 3 | 2 | 1.6218 | 56.7095 | 5  | 1 | 1 |
| 2.1389 | 42.2161 | -2 | 2 | 3 | 1.6173 | 56.8845 | -4 | 3 | 1 |
| 2.1335 | 42.3265 | 4  | 0 | 0 | 1.6154 | 56.9549 | -2 | 3 | 4 |
| 2.1305 | 42.3889 | 1  | 3 | 2 | 1.6153 | 56.9594 | 0  | 4 | 3 |
| 2.1284 | 42.433  | -2 | 3 | 1 | 1.6088 | 57.2131 | -3 | 0 | 5 |
| 2.127  | 42.4636 | 1  | 1 | 4 | 1.6071 | 57.279  | 2  | 4 | 2 |
| 2.1051 | 42.9265 | -2 | 0 | 4 | 1.5998 | 57.5643 | -5 | 1 | 2 |
| 2.0984 | 43.0696 | 2  | 3 | 1 | 1.5968 | 57.6833 | -1 | 4 | 3 |
| 2.0855 | 43.3495 | -3 | 2 | 2 | 1.591  | 57.9105 | 4  | 3 | 1 |
| 2.0853 | 43.3545 | -3 | 1 | 3 | 1.5907 | 57.9247 | -4 | 1 | 4 |
| 2.0533 | 44.0651 | 4  | 1 | 0 | 1.5897 | 57.9628 | -2 | 2 | 5 |
| 2.0513 | 44.1115 | 2  | 2 | 3 | 1.5889 | 57.9965 | 3  | 2 | 4 |
| 2.0367 | 44.4431 | 3  | 0 | 3 | 1.5839 | 58.1958 | 3  | 3 | 3 |
| 2.0315 | 44.5623 | -4 | 1 | 1 | 1.5777 | 58.4472 | 1  | 4 | 3 |
| 2.0279 | 44.6464 | -2 | 1 | 4 | 1.574  | 58.5972 | 3  | 4 | 0 |
| 2.0041 | 45.2066 | 3  | 2 | 2 | 1.5735 | 58.6177 | -3 | 1 | 5 |
| 1.9957 | 45.4079 | 2  | 0 | 4 | 1.5644 | 58.994  | 2  | 3 | 4 |
| 1.9922 | 45.4909 | -2 | 3 | 2 | 1.5611 | 59.1294 | -3 | 4 | 1 |
| 1.9888 | 45.5743 | -4 | 0 | 2 | 1.561  | 59.1325 | -4 | 3 | 2 |
| 1.9863 | 45.6345 | 0  | 2 | 4 | 1.558  | 59.2587 | 4  | 2 | 3 |
| 1.9803 | 45.7811 | 4  | 1 | 1 | 1.5565 | 59.3228 | 0  | 0 | 6 |
| 1.9666 | 46.1179 | 3  | 1 | 3 | 1.5555 | 59.3622 | 5  | 2 | 0 |
| 1.9584 | 46.3206 | 0  | 3 | 3 | 1.549  | 59.64   | -5 | 2 | 1 |
| 1.958  | 46.3317 | -1 | 2 | 4 | 1.5433 | 59.8816 | 3  | 4 | 1 |
| 1.9438 | 46.6907 | 2  | 3 | 2 |        |         |    |   |   |

---

## Calculations of Judd–Ofelt theory

The experimental absorption line strength  $S_{exp}$  from the ground state to the excited states can be calculated by the following equation (S1).

$$S_{exp} = \frac{9n}{(n^2 + 2)^2} \cdot \frac{3hc(2J+1)}{8\pi^3 e^2 \bar{\lambda} N_0} \cdot \int \alpha(\lambda) d\lambda \quad (S1)$$

Where  $n$  is the refractive index ( $n=1.5$ , RHG-181 refractive index instrument),  $h$  is the Planck constant,  $J$  is the total angular momentum of the initial level ( $J=9/2$  for  $Nd^{3+}$ ),  $e$  is the electric charge,  $c$  is the velocity of light,  $N_0$  is the  $Nd^{3+}$  concentrations,  $\bar{\lambda}$  is the average wavelength of the absorption band,  $\alpha(\lambda)$  is the absorption coefficient at the wavelength  $\lambda$ .

The line strength  $S_{exp}$  can also be expressed with the three-parameter formula (S2)

$$S_{cal} = \sum_{\lambda=2,4,6} \Omega_{\lambda} \left\langle (S, L)J \left\| U^{(\lambda)} \right\| (S', L')J' \right\rangle^2 \quad (S2)$$

Where  $\|U^{(\lambda)}\|$  are the double reduce matrix elements of unit tensor operators.

The J-O intensity parameters  $\Omega_{\lambda}$  ( $\lambda=2, 4, 6$ ) can be calculated using the least-squares-fit method. The effective J-O intensity parameters for the biaxial crystal are determined as  $\Omega_{eff}=1/3(\Omega_{E//X}+\Omega_{E//Y}+\Omega_{E//Z})$ .

The electric-dipole radiative transition rates  $A_r$  corresponding to transitions from the excited state  $|(S', L')J'\rangle$  to all possible lower lying states  $|(S'', L'')J''\rangle$  can be calculated by equation (S3).

$$A_r [(S'L')J', (S''L'')J''] = \frac{n(n^2 + 2)^2}{9} \times \frac{64\pi^2 e^2}{3h(2J'+1)\bar{\lambda}^3} \times \sum_{\lambda=2,4,6} \Omega_{\lambda} \left\langle (S'L')J' \left\| U^{(\lambda)} \right\| (S''L'')J'' \right\rangle^2 \quad (S3)$$

The fluorescence branching ratio  $\beta$  can be calculated by equations (S4)

$$\beta_r [(S', L')J'; (S'', L'')J''] = \frac{A_r [(S', L')J'; (S'', L'')J'']}{\sum_{S'', L'', J''} A_r [(S', L')J'; (S'', L'')J'']} \quad (S4)$$

The radiative lifetime  $\tau_r$  can be calculated by equation (S5)

$$\tau_r = \frac{1}{\sum_{S'', L'', J''} A_r [(S', L')J'; (S'', L'')J'']} \quad (S5)$$
